# Supplementary material for: Direct effects of ocean alkalinity enhancement in the Baltic Sea–results from in-silico experiments
Source: Frontiers journal article supplement (doi:10.3389/fclim.2025.1450468), 2025-03-10
Supplement: Data_Sheet_1.pdf [file Data_Sheet_1.pdf]

## Supplementary Material

### 1 MODEL VALIDATION

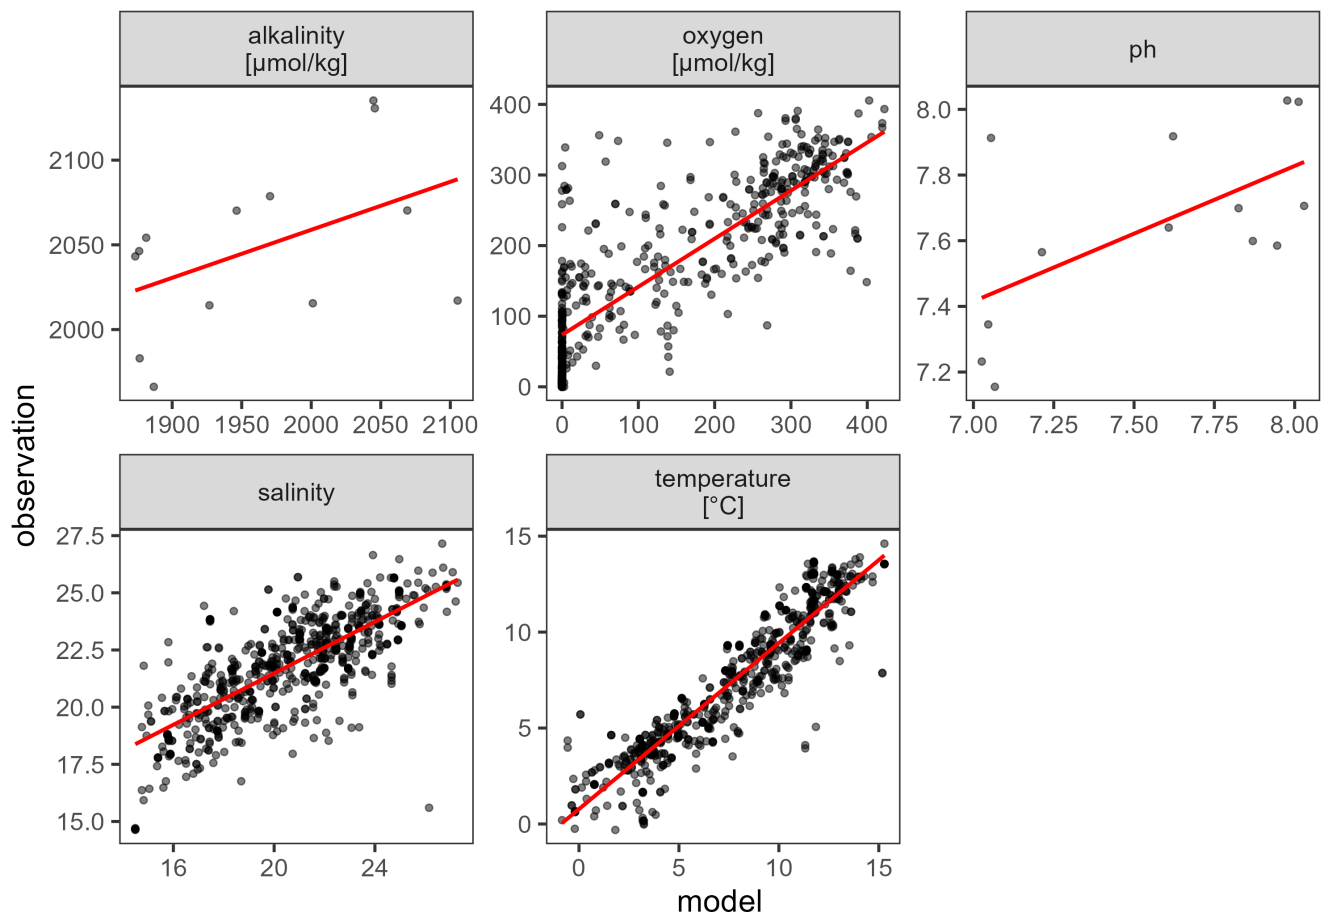

**Figure S1.** Model data (control run) from the lowermost grid cell and observational data near the bottom at the station Boknis Eck (observational data > 20 m). The observational data was retrieved from the PANGAEA database. For better visibility in high data density, the dots are slightly transparent.

### 2 ESTIMATION OF THE POSSIBILITY OF A DECREASE IN PHYTOPLANKTON GROWTH AS A RESULT OF LOWER $\text{pCO}_2$ THROUGH OAE

#### 2.1 Overall idea

If ocean alkalinity enhancement is used to enhance the  $\text{CO}_2$  flux from the atmosphere to the sea, this will only work by lowering the surface water  $\text{pCO}_2$ . A lower  $\text{pCO}_2$  may, however, decelerate phytoplankton growth. We want to estimate by how much.

## 2.2 CO<sub>2</sub> drawdown rates

For the Baltic Sea, a calcite dissolution rate of  $2.94 \mu\text{mol cm}^{-2} \text{d}^{-1}$  was suggested by Fuhr et al. (2024), in agreement with model studies by Anschütz et al. Considering that 1 mol of calcite contributes 2 mol of alkalinity, and assuming a CO<sub>2</sub> drawdown efficiency of 0.85 (Montserrat et al., 2017), this would mean a CO<sub>2</sub> capture of  $F = 5.00 \mu\text{mol cm}^{-2} \text{d}^{-1} = 5.78 \times 10^{-7} \text{mol m}^{-2} \text{s}^{-1}$ .

## 2.3 Wanninkhof flux formula

According to Wanninkhof (2014) and their equation (6), the CO<sub>2</sub> flux across the air-sea interface can be approximated by the formula

$$F = k K_0 (pCO_{2,w} - pCO_{2,a}) , \quad (\text{S1})$$

where  $F$  describes the flux,  $k$  is the transfer coefficient,  $K_0$  is a solubility, and  $pCO_{2,w}$  and  $pCO_{2,a}$  are the partial pressures of CO<sub>2</sub> in water and air, respectively. The transfer coefficient  $k$  can be calculated as

$$k = 0.251 \cdot \text{cm h}^{-1} \text{s}^2 \text{m}^{-2} u_{av}^2 , \quad (\text{S2})$$

where  $u_{av}$  is the average wind speed. In more useful units, it states

$$k = 9.036 \cdot \text{s m}^{-1} u_{av}^2 . \quad (\text{S3})$$

For wind speeds of 1, 5 and 10 m s<sup>-1</sup>, this gives

$$k_{1 \text{ m/s}} = 9.036 \text{ m s}^{-1} \quad (\text{S4})$$

$$k_{5 \text{ m/s}} = 225.9 \text{ m s}^{-1} \quad (\text{S5})$$

$$k_{10 \text{ m/s}} = 903.6 \text{ m s}^{-1} . \quad (\text{S6})$$

A balance between ocean and atmosphere, i.e. a zero flux, is reached if

$$pCO_{2,w} = pCO_{2,a} \quad (\text{S7})$$

For the given flux  $F$ , we obtain

$$pCO_{2,w} = \frac{F}{k \cdot K_0} + pCO_{2,a} \quad (\text{S8})$$

The difference is therefore given by

$$\Delta pCO_{2,w} = \frac{F}{k \cdot K_0} . \quad (\text{S9})$$

For sea water with 10 °C, Wanninkhof 2014 gives a solubility of

$$K_0 = 4.45 \cdot 10^{-4} \text{ mol m}^{-3} \text{Pa}^{-1} \quad (\text{S10})$$

We therefore get

$$\Delta pCO_{2,1 \text{ m/s}} = 1.44 \cdot 10^{-4} \text{ Pa} \quad (\text{S11})$$

$$\Delta pCO_{2,5 \text{ m/s}} = 5.75 \cdot 10^{-6} \text{ Pa} \quad (\text{S12})$$

$$\Delta pCO_{2,10 \text{ m/s}} = 1.44 \cdot 10^{-6} \text{ Pa} . \quad (\text{S13})$$

As the atmospheric  $pCO_2$  is around 40 Pa, the expected permanent change in  $pCO_2$  that is required to sustain the desired uptake flux is at least 5 orders of magnitude smaller, so far from being significant.

## REFERENCES

- Fuhr, M., Wallmann, K., Dale, A. W., Kalapurakkal, H. T., Schmidt, M., Sommer, S., et al. (2024). Alkaline mineral addition to anoxic to hypoxic Baltic Sea sediments as a potentially efficient CO<sub>2</sub>-removal technique. *Front. Clim.* 6, 1338556. doi:10.3389/fclim.2024.1338556
- Montserrat, F., Renforth, P., Hartmann, J., Leermakers, M., Knops, P., and Meysman, F. J. R. (2017). Olivine Dissolution in Seawater: Implications for CO<sub>2</sub> Sequestration through Enhanced Weathering in Coastal Environments. *Environ. Sci. Technol.* 51, 3960–3972. doi:10.1021/acs.est.6b05942
- Wanninkhof, R. (2014). Relationship between wind speed and gas exchange over the ocean revisited. *Limnology and Oceanography: Methods* 12, 351–362. doi:10.4319/lom.2014.12.351
